# Supplementary material
Source: PubMed Central journal article supplement (PMC2882735)
Supplement: supp_M006304_jlr.M006304-1.pdf [file supp_M006304_jlr.M006304-1.pdf]

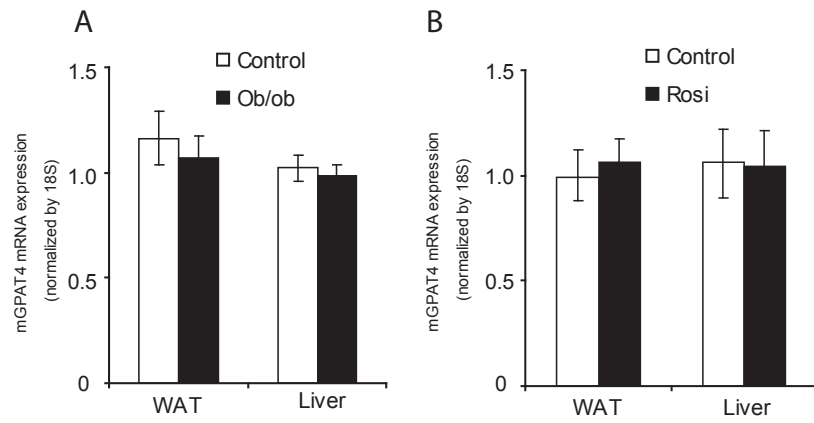

Fig.S1

Fig. S1. Regulation of GPAT3 and GPAT4 mRNA. A. GPAT4 mRNA in white adipose tissue (WAT) or liver from *ob/ob* mice or wild-type control mice. B. GPAT4 mRNA in WAT or liver from Vehicle (Veh)- or Rosiglitazone (Rosi) – treated mice. Data are expressed as mean  $\pm$  SD (n=4).
